# Supplementary material
Source: publisher figshare collection journal article supplement (https://geolsoc.figshare.com/ndownloader/files/28842964)
Supplement: Supplementary file 1 [file 28842964]

## Sheet: Feuil1
	Chemical elements	Region Of Interest (ROI) in keV	Ka (keV)	Kb (keV)	Escape peak (keV)
	Ca	3.6 – 3.8	3.692	4.013	-
	Sc	3.9 – 4.1	4.091	4.461	-
	Ti	4.31 – 4.71	4.511	4.932	-
	Mn	-	5.899	6.490	4.159 (Ka)
					4.751 (Kb)
	Fe	-	6.404	7.058	4.664 (Ka)
					5.318 (Kb)
	Table A: Spectral characteristics (ROI ranges, Kα, Kβ spectral lines and escape peaks) for Ca, Sc, Ti, Mn and Fe analyse using pXRF, expressed in keV.
	The ROI ranges are obtained by the NDT Alpha software relative to pXRF (NitonTM XL3t GOLDD+ of ThermoFisher ScientificTM) with the ‘Soil’ mode using the ‘Low’ filter (20 kV and Cu target). EDS resolution is 130 eV based on the Kα spectral line of Mn. For this study, the critical spectral interference is coloured blue-grey (Ca interfering with Sc), while other spectral interferences are coloured l…
